# Supplementary material for: Association between Polyunsaturated Fatty Acid Profile and Bronchial Inflammation in Bronchiolitis Obliterans
Source: Hindawi journal article supplement (doi:10.1155/2023/3406399), 2023-07-05
Supplement: f1 [file 3406399.f1.pdf]

Suppl. Table 1. Correlations between the AA:DHA ratio, lung function parameters and inflammation

| 1. Parameter | 2. Parameter | <i>r</i> | <i>p</i> -Value |
|--------------|--------------|----------|-----------------|
| FVC          | Neutrophils  | -0.48    | <0.05           |
| FVC          | Macrophages  | 0.49     | <0.05           |
| FVC          | Lymphocytes  | 0.05     | 0.82            |
| FVC          | IL-1 $\beta$ | -0.32    | 0.08            |
| FVC          | IL-6         | -0.59    | <0.01           |
| FVC          | IL-8         | -0.57    | <0.001          |
| FVC          | AA:DHA       | -0.25    | 0.19            |
| FEV1         | Neutrophils  | -0.51    | <0.01           |
| FEV1         | Macrophages  | 0.53     | <0.01           |
| FEV1         | Lymphocytes  | 0.01     | 0.97            |
| FEV1         | IL-1 $\beta$ | -0.20    | 0.28            |
| FEV1         | IL-6         | -0.55    | <0.01           |
| FEV1         | IL-8         | -0.44    | <0.05           |
| FEV1         | AA:DHA       | -0.29    | 0.12            |
| RV           | Neutrophils  | 0.45     | <0.05           |
| RV           | Macrophages  | -0.46    | <0.05           |
| RV           | Lymphocytes  | 0.04     | 0.86            |
| RV           | IL-1 $\beta$ | -0.13    | 0.50            |
| RV           | IL-6         | 0.30     | 0.11            |
| RV           | IL-8         | 0.13     | 0.47            |
| RV           | AA:DHA       | 0.13     | 0.52            |
| LCI          | Neutrophils  | 0.67     | <0.01           |
| LCI          | Macrophages  | -0.99    | <0.0001         |
| LCI          | Lymphocytes  | 0.20     | 0.32            |
| LCI          | IL-1 $\beta$ | 0.33     | 0.11            |
| LCI          | IL-6         | 0.20     | 0.34            |
| LCI          | IL-8         | 0.52     | <0.01           |
| LCI          | AA:DHA       | 0.37     | 0.08            |
| Neutrophils  | AA:DHA       | 0.05     | 0.82            |
| Macrophages  | AA:DHA       | -0.09    | 0.70            |
| Lymphocytes  | AA:DHA       | 0.19     | 0.39            |
| IL-1 $\beta$ | AA:DHA       | 0.44     | <0.05           |
| IL-6         | AA:DHA       | 0.54     | <0.01           |
| IL-8         | AA:DHA       | 0.38     | <0.05           |

Suppl. Table 2. analysed fatty acids in sputum cells

| Fatty acids %wt | Patients (Mean) | Patients (SD) | Controls (Mean) | Controls (SD) |
|-----------------|-----------------|---------------|-----------------|---------------|
| C8:0            | 0.26            | 0.48          | 0.08            | 0.08          |
| C10:0           | 0.17            | 0.35          | 0.06            | 0.07          |
| C11:0           | 0.48            | 0.72          | 0.16            | 0.15          |
| C12:0           | 0.17            | 0.29          | 0.05            | 0.04          |
| C13:0           | 0.15            | 0.24          | 0.04            | 0.05          |
| C14:0           | 0.24            | 0.46          | 0.04            | 0.02          |
| C14:1           | 0.24            | 0.19          | 0.28            | 0.14          |
| C15:0           | 0.67            | 0.19          | 0.86            | 0.78          |
| C15:1           | 0.23            | 0.38          | 0.03            | 0.02          |
| C16:0           | 44.56           | 9.43          | 42.64           | 11.89         |
| C16:1n7t        | 0.20            | 0.28          | 0.19            | 0.18          |
| C16:1n7c        | 2.04            | 0.73          | 2.23            | 1.30          |
| C17:1           | 0.03            | 0.01          | 0.14            | 0.11          |
| C18:0           | 7.05            | 5.83          | 11.24           | 6.12          |
| C18:1n9t        | 0.32            | 0.19          | 0.53            | 0.34          |
| C18:1n9c        | 22.74           | 3.13          | 23.40           | 8.64          |
| C18:1n7 (VAC)   | 1.93            | 0.59          | 6.40            | 15.02         |
| C18:2n6t (LEA)  | 0.08            | 0.03          | 0.17            | 0.13          |
| C18:2n6c (LA)   | 6.97            | 2.52          | 6.85            | 3.15          |
| C18:3n6 (GLA)   | 1.26            | 1.51          | 1.73            | 3.06          |
| C18:3n3 (ALA)   | 0.25            | 0.22          | 0.37            | 0.32          |
| C20:0           | 0.20            | 0.14          | 0.31            | 0.20          |
| C18:4n3 (STA)   | 0.09            | 0.15          | 0.31            | 0.54          |
| C20:1n9c        | 0.44            | 0.28          | 0.30            | 0.15          |
| C21:0           | 0.05            | 0.07          | 0.13            | 0.35          |
| C20:2           | 0.26            | 0.17          | 0.20            | 0.11          |
| C20:3n9 (MA)    | 0.15            | 0.05          | 1.55            | 4.21          |
| C20:3n6         | 0.92            | 0.44          | 0.69            | 0.39          |
| C20:4n6 (AA)    | 5.51            | 2.26          | 3.64            | 1.38          |
| C20:3n3         | 0.06            | 0.06          | 0.06            | 0.04          |
| C22:0           | 0.08            | 0.04          | 0.17            | 0.10          |
| C22:1n9         | 0.13            | 0.12          | 0.09            | 0.04          |
| C20:5n3 (EPA)   | 0.20            | 0.14          | 0.17            | 0.09          |
| C23:0           | 0.06            | 0.11          | 0.02            | 0.02          |
| C22:2           | 0.03            | 0.02          | 0.03            | 0.03          |
| C22:4n6 (ADA)   | 0.80            | 0.43          | 0.43            | 0.20          |
| C24:0           | 0.10            | 0.07          | 0.17            | 0.12          |
| C24:1n9         | 0.09            | 0.04          | 0.06            | 0.02          |
| C22:5n3 (DPA)   | 0.47            | 0.17          | 0.32            | 0.18          |
| C22:6n3 (DHA)   | 0.69            | 0.23          | 0.62            | 0.25          |

Data is shown as Mean  $\pm$ SD.

Suppl. Table 3. analysed fatty acids in blood cells

| Fatty acid %wt | Patients (Mean) | Patients (SD) | Controls (Mean) | Controls (SD) |
|----------------|-----------------|---------------|-----------------|---------------|
| C14:0          | 0.37            | 0.29          | 0.34            | 0.09          |
| C15:0          | 0.14            | 0.02          | 0.18            | 0.04          |
| C16:1n7t       | 21.14           | 3.22          | 22.57           | 1.77          |
| C16:1n7c       | 0.48            | 0.20          | 0.58            | 0.40          |
| C17:0          | 0.30            | 0.15          | 0.28            | 0.04          |
| C18:0          | 16.22           | 1.13          | 15.20           | 1.74          |
| C18:1n9c       | 16.22           | 1.39          | 15.28           | 1.30          |
| C18:1n7        | 1.33            | 0.18          | 1.43            | 0.20          |
| C18:2n6c       | 15.10           | 1.46          | 15.09           | 1.43          |
| C18:3n6        | 0.17            | 0.10          | n.d.            | n.d.          |
| C18:3n3        | 0.26            | 0.18          | 0.19            | 0.04          |
| C20:1n9c       | 0.31            | 0.12          | 0.27            | 0.05          |
| C20:2          | 0.29            | 0.19          | 0.24            | 0.03          |
| C20:3n9        | 0.12            | 0.02          | n.d.            | n.d.          |
| C20:3n6        | 1.96            | 0.48          | 2.06            | 0.49          |
| C20:4n6        | 15.83           | 1.38          | 15.55           | 1.06          |
| C22:0          | 0.12            | 0.03          | n.d.            | n.d.          |
| C22:1n9        | 0.24            | 0.17          | 0.22            | 0.05          |
| C20:5n3        | 0.55            | 0.23          | 0.55            | 0.10          |
| C22:4n6 (ADA)  | 3.99            | 3.13          | 3.09            | 0.44          |
| C22:5n3        | 2.30            | 0.29          | 2.41            | 0.44          |
| C22:6n3        | 3.80            | 0.87          | 4.49            | 0.70          |

Data is shown as Mean  $\pm$ SD. n.d., not defined
